# Supplementary material for: Epidermal growth factor receptor and epididymis invasion as prognostic biomarkers in clinical stage I testicular germ cell tumours
Source: Springer Nature journal article supplement (doi:10.1186/s12967-017-1162-3), 2017-03-20
Supplement: MOESM1 [file 12157766]

Supplementary Table 1. Characteristics of primers used in EGFR exons 19, 20 and 21 amplification.

| Exon | Primer   | Sequence                              | Fluorophore | Fluorophore Final [ ] | Hibridation Temperature | Amplicon size (bp) |
|------|----------|---------------------------------------|-------------|-----------------------|-------------------------|--------------------|
| 19   | Forward  | 5'-GGA CTC TGG ATC CCA<br>GAA GG- 3'  | 6FAM™       | 0,2 µM                | 64°C                    | 145                |
|      | Reverse  | 5'-CCT GAG GTT CAG AGC<br>CAT GG- 3'  |             | 0,4 µM                |                         |                    |
| 20   | Forward  | 5'-ATG CGA AGC CAC ACT<br>GAC G-3'    | 6FAM™       | 0,2 µM                | 60°C                    | 204                |
|      | Reverse  | 5'- CAC CAG TTG AGC AGG<br>TAC TG- 3' |             | 0,4 µM                |                         |                    |
| 21   | Forward  | 5'-GAG GAC CGT CGC TTG<br>GTG CA-3'   |             | 0,08 µM               | 52°C                    | 216 (147**)        |
|      | Forward* | 5'-CAA GAT CAC AGA TTT<br>TGG ACG-3'  |             | 0,8 µM                |                         |                    |
|      | Reverse  | 5'- CAA TAC AGC TAG TGG<br>GAA G-3'   | HEX         | 0,4 µM                |                         |                    |

\*specific for mutated allele; \*\*amplicon size when p.L858R mutation is present
