# Supplementary material for: Epidermal growth factor receptor and epididymis invasion as prognostic biomarkers in clinical stage I testicular germ cell tumours
Source: Springer Nature journal article supplement (doi:10.1186/s12967-017-1162-3), 2017-03-20
Supplement: MOESM2 [file 12157766]

Supplementary Table 2. EGFR, hMLH1 and hMSH2 expression in TGCT subtypes.

|              | hMLH1    |           |           |       | hMSH2    |          |           |       | EGFR     |           |       |
|--------------|----------|-----------|-----------|-------|----------|----------|-----------|-------|----------|-----------|-------|
|              | Nule     | Low       | Normal    | Total | Nule     | Low      | Normal    | Total | +        | -         | Total |
| Seminoma     | <b>0</b> | <b>10</b> | <b>17</b> | 27    | <b>0</b> | <b>8</b> | <b>19</b> | 27    | <b>7</b> | <b>20</b> | 27    |
| EC           | <b>2</b> | <b>12</b> | <b>8</b>  | 22    | <b>1</b> | <b>6</b> | <b>15</b> | 22    | <b>8</b> | <b>14</b> | 22    |
| Teratoma     | <b>0</b> | <b>0</b>  | <b>3</b>  | 3     | <b>0</b> | <b>1</b> | <b>2</b>  | 3     | <b>2</b> | <b>1</b>  | 3     |
| YST          | <b>2</b> | <b>1</b>  | <b>1</b>  | 4     | <b>0</b> | <b>0</b> | <b>4</b>  | 4     | <b>0</b> | <b>4</b>  | 4     |
| <b>Total</b> | 4        | 23        | 29        | 56    | 1        | 15       | 40        | 56    | 17       | 39        | 56    |
