# Supplementary material for: Epidermal growth factor receptor and epididymis invasion as prognostic biomarkers in clinical stage I testicular germ cell tumours
Source: Springer Nature journal article supplement (doi:10.1186/s12967-017-1162-3), 2017-03-20
Supplement: MOESM3 [file 12157766]

**Supplementary Table 3.**

**A. Univariate analysis Seminoma**

| Variable                    | Relapse-free survival |                | p-value |
|-----------------------------|-----------------------|----------------|---------|
|                             | 5 years-RFS (%)       | HR (95% CI)    |         |
| <b>Age</b>                  |                       |                |         |
| ≤ 30                        | 89                    | 1.1 (0.1-12.4) | 0.88    |
| >30                         | 89                    | 1              |         |
| <b>LVI</b>                  |                       |                |         |
| Yes                         | 87                    | 1.5 (0.1-16.8) | 0.7     |
| No                          | 90                    | 1              |         |
| <b>Tumor size</b>           |                       |                |         |
| ≥4 cm                       | 83                    | 3.4 (1.3-8.6)  | 0.05    |
| <4 cm                       | 100                   | 1              |         |
| <b>Rete testis invasion</b> |                       |                |         |
| Yes                         | 67                    | 3.5 (1.3-9.2)  | 0.02    |
| No                          | 100                   | 1              |         |
| <b>Epididymus invasion</b>  |                       |                |         |
| Yes                         | 50                    | 2.9 (0.9-8.9)  | 0.06    |
| No                          | 93                    | 1              |         |
| <b>hMLH1 expression</b>     |                       |                |         |
| Null/low                    | 90                    | 1.3 (0.1-15.5) | 0.80    |
| Normal                      | 88                    | 1              |         |
| <b>hMSH2 expression</b>     |                       |                |         |
| Null/low                    | 100                   | 0.7 (0.2-2.3)  | 0.40    |
| Normal                      | 84                    | 1              |         |
| <b>EGFR expression</b>      |                       |                |         |
| Positive                    | 71                    | 2.7 (0.9-8.6)  | 0.06    |
| Negative                    | 95                    | 1              |         |

## B. Univariate analysis Non Seminoma

| Variable                    | Relapse-free survival |               |         |
|-----------------------------|-----------------------|---------------|---------|
|                             | 5 years-RFS (%)       | HR (95% CI)   | p-value |
| <b>Age</b>                  |                       |               |         |
| ≤ 30                        | 53                    | 1.8 (0.6-5.6) | 0.27    |
| >30                         | 71                    | 1             |         |
| <b>LVI</b>                  |                       |               |         |
| Yes                         | 36                    | 3.5 (1.2-9.8) | 0.01    |
| No                          | 77                    | 1             |         |
| <b>Tumor size</b>           |                       |               |         |
| ≥4 cm                       | 43                    | 3.0 (1-9.3)   | 0.04    |
| <4 cm                       | 78                    | 1             |         |
| <b>Rete testis invasion</b> |                       |               |         |
| Yes                         | 50                    | 2.3 (0.8-7.1) | 0.13    |
| No                          | 75                    | 1             |         |
| <b>Epididymus invasion</b>  |                       |               |         |
| Yes                         | 17                    | 2.4 (0.8-6.6) | 0.09    |
| No                          | 65                    | 1             |         |
| <b>hMLH1 expression</b>     |                       |               |         |
| Null/low                    | 53                    | 1.8 (0.5-5.8) | 0.35    |
| Normal                      | 67                    | 1             |         |
| <b>hMSH2 expression</b>     |                       |               |         |
| Null/low                    | 62                    | 0.8 (0.2-2.9) | 0.72    |
| Normal                      | 57                    | 1             |         |
| <b>EGFR expression</b>      |                       |               |         |
| Positive                    | 40                    | 2.7 (0.9-8.5) | 0.07    |
| Negative                    | 68                    | 1             |         |
