# Supplementary material for: Epidermal growth factor receptor and epididymis invasion as prognostic biomarkers in clinical stage I testicular germ cell tumours
Source: Springer Nature journal article supplement (doi:10.1186/s12967-017-1162-3), 2017-03-20

Supplementary Figure 1.

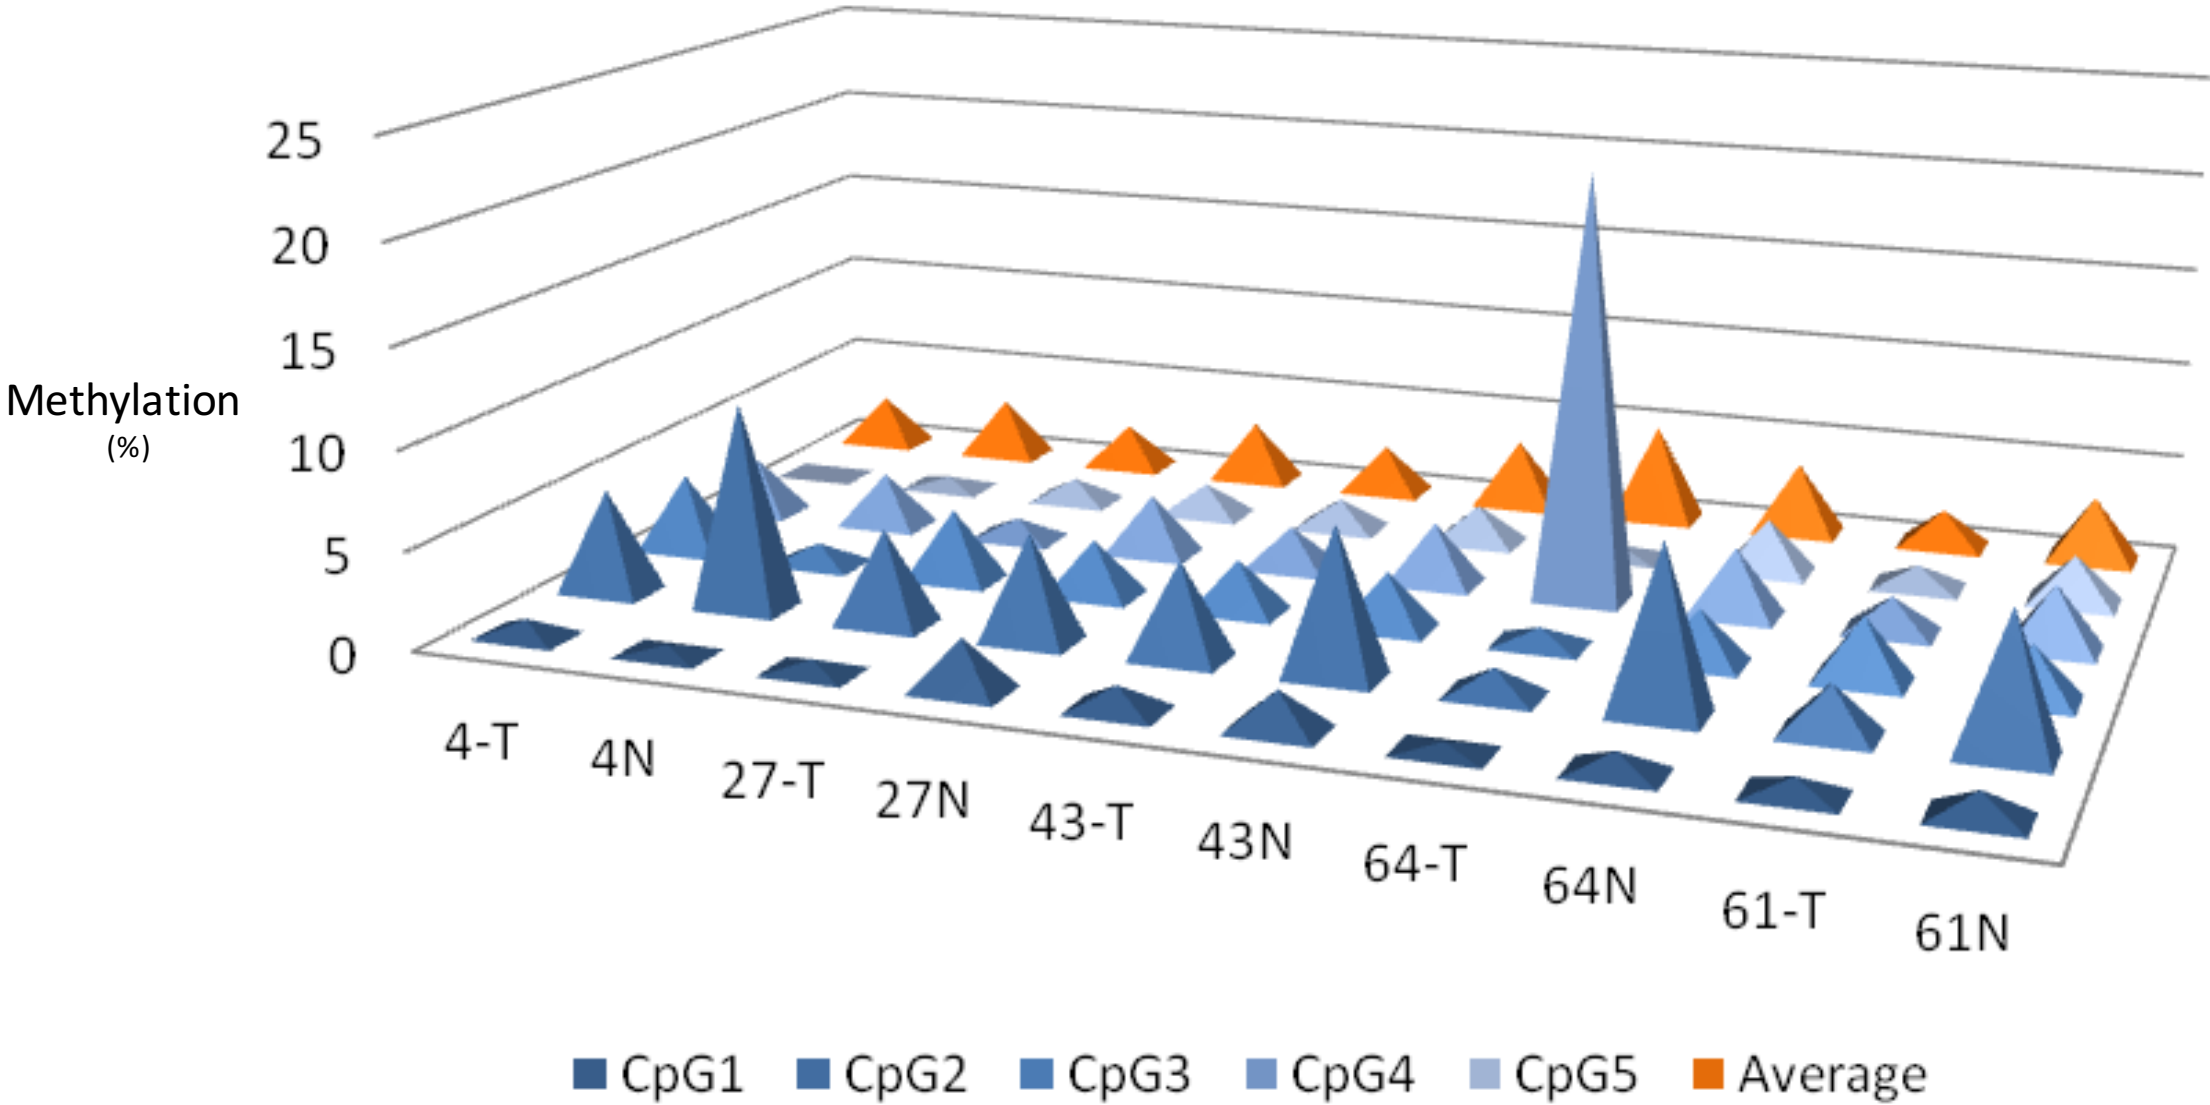

Supplement: MOESM4 [file 12157766]
